# Supplementary material for: Maneuvering the growth of silver nanoplates: use of halide ions to promote vertical growth
Source: Royal Society of Chemistry journal article supplement (doi:10.1039/c4tc00899e), 2014-01-01
Supplement: c4tc00899e1.pdf [file c4tc00899e1.pdf]

# **Maneuvering the Growth of Silver Nanoplate: Use of Halide Ions to Promote Vertical Growth**

**Mun Ho Kim,<sup>\*a</sup> Su Kyoung Kwak,<sup>a</sup> Sang Hyuk Im,<sup>b</sup> Jong-Bae Lee,<sup>a</sup> Kil-Yeong Choi,<sup>a</sup> and Doo-Jin Byun<sup>\*a</sup>**

*<sup>a</sup>Reliability Assessment Center for Chemical Materials, Korea Research Institute of Chemical Technology (KRICT), 141 Gajeong-ro, Yuseong-gu, Daejeon 305-600, Republic of Korea.*

*<sup>b</sup>Department of Chemical Engineering, Kyung Hee University, Yongin-si, Kyunggi-do 446-701, Republic of Korea*

## Supporting Figures

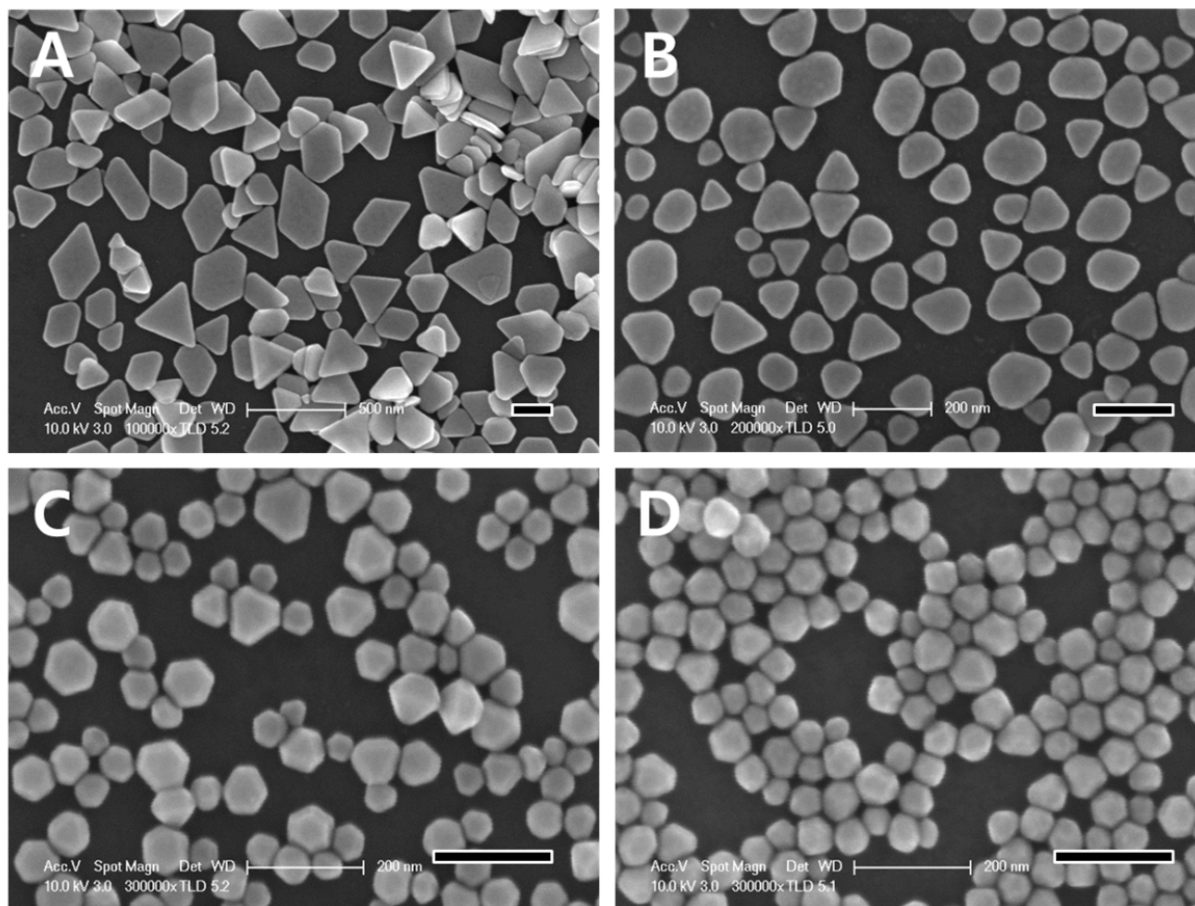

**Fig. S1** SEM images of the Ag nanoplates shown in Figure 1 (scale bar = 200 nm for all images).

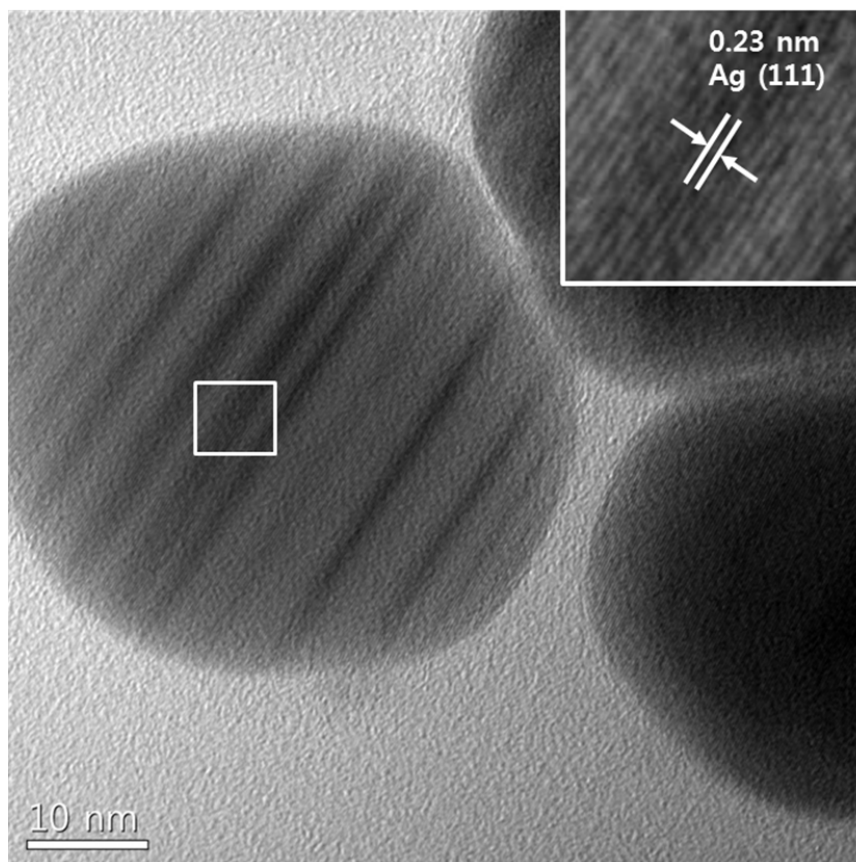

**Fig. S2.** High-resolution TEM image of Ag nanoplates formed in the presence of  $\Gamma^-$ . The inset shows the lattice spacing of the Ag nanoplate.

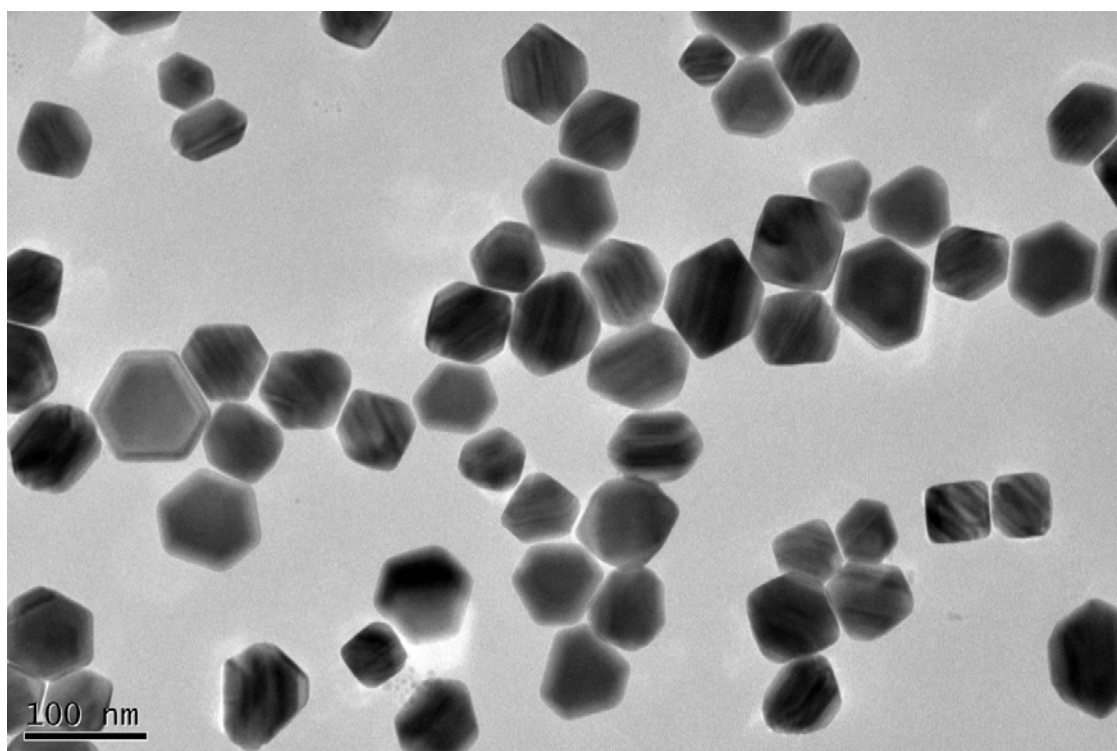

**Fig. S3** TEM image of Ag nanoplates formed in the presence of NaI.

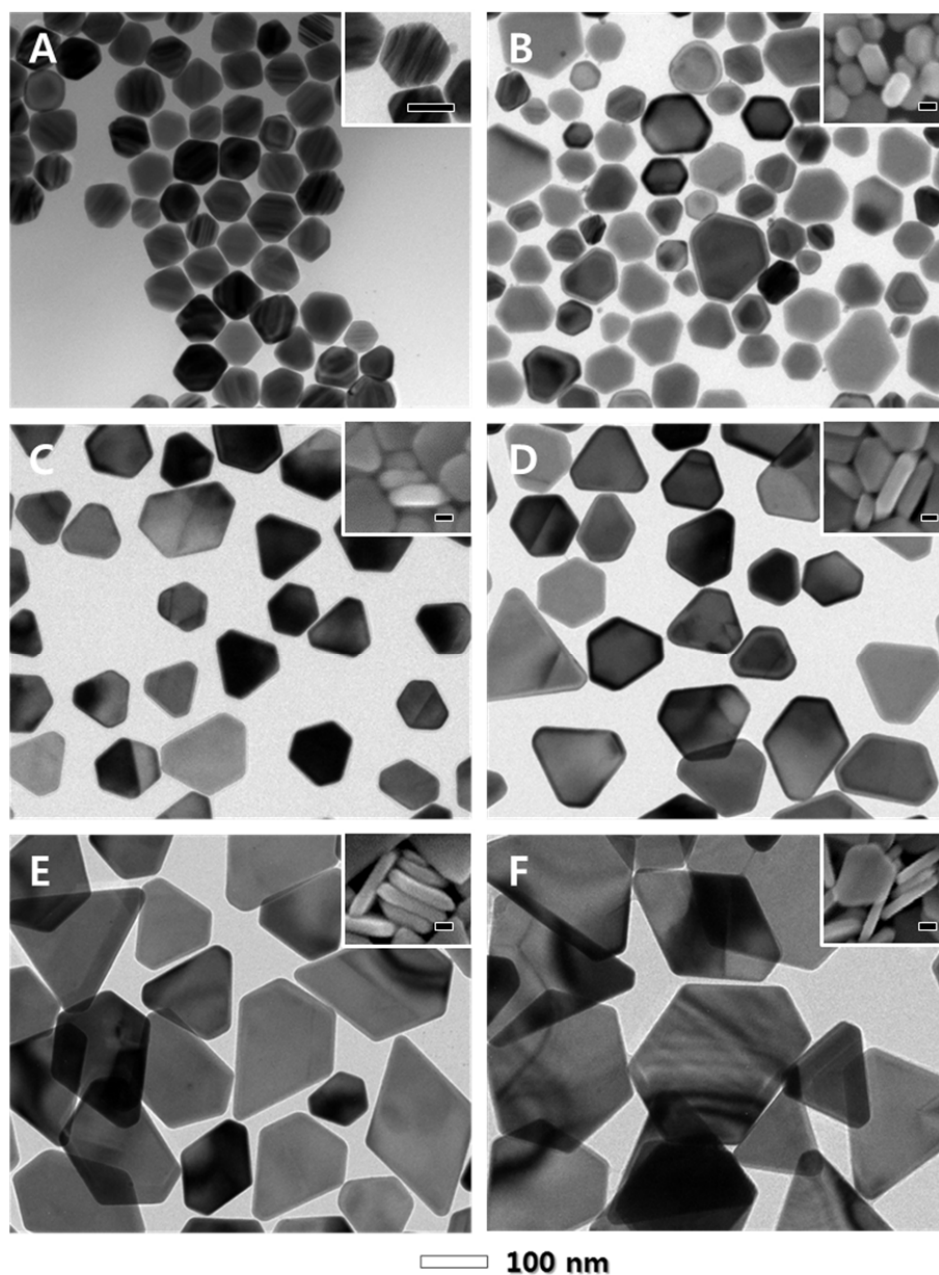

**Fig. S4.** TEM images of Ag nanoplates shown in Figure 3. The inset in A shows TEM image taken from samples in which the nanoplate was oriented vertically on the substrate (scale bar = 50 nm). The insets of (B)-(F) show SEM images taken from samples in which the nanoplates were oriented vertically on the substrate (scale bar = 50 nm).

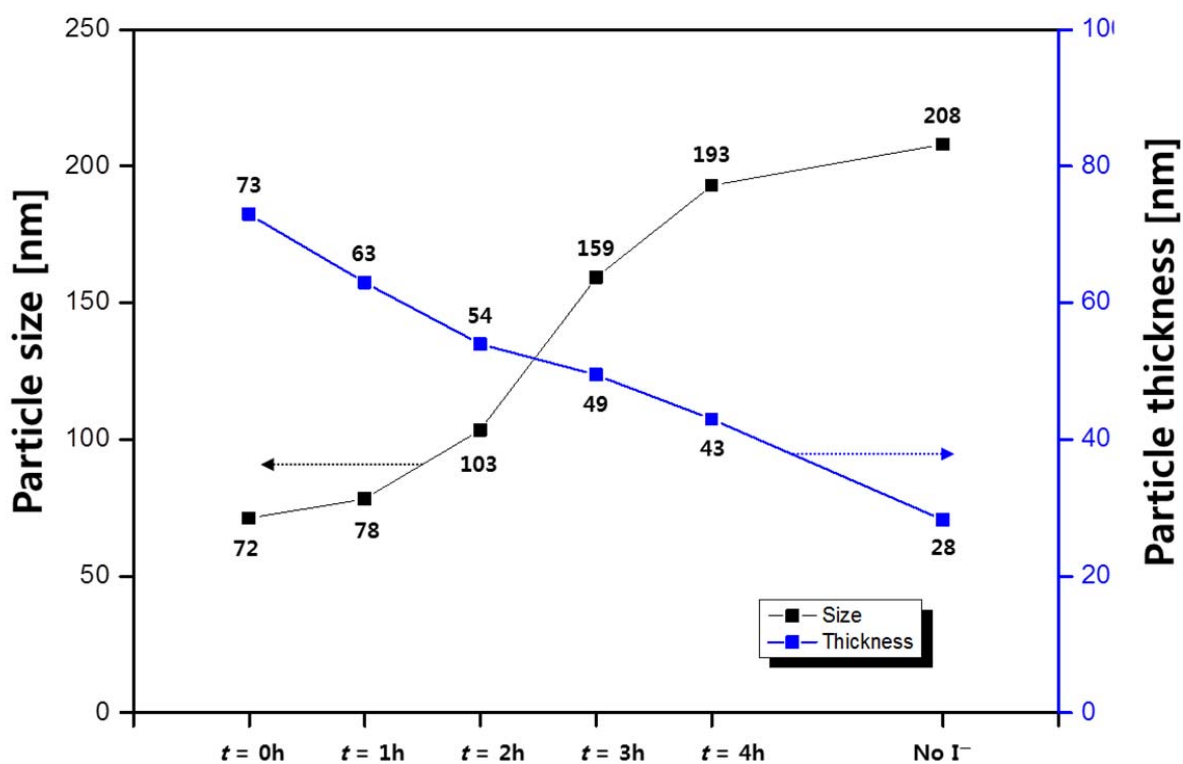

**Fig. S5.** Plots of the average particle size and thickness of the Ag nanoplates shown in Fig. S4 as a function of the time, during the nanoplate growth process, at which the iodide ions were added.

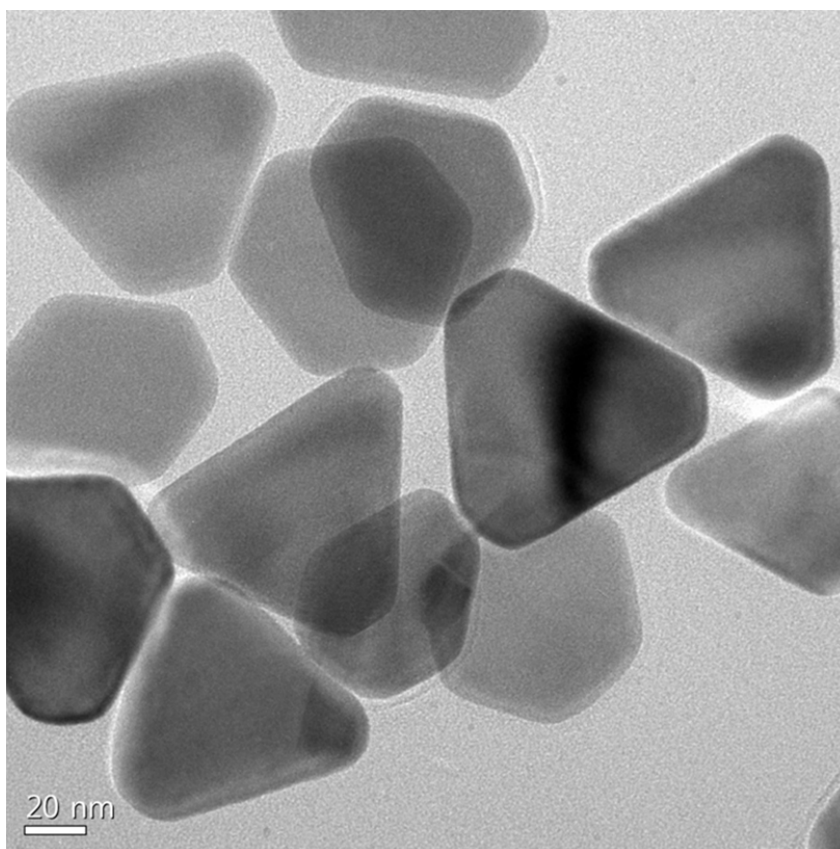

**Fig. S6.** TEM image of Ag nanoplates. The synthesis was performed by decreasing the concentration of the iodide to 1/2.
